# Supplementary material for: Layer-by-layer assembled stimuli-responsive nanoporous membranes
Source: Royal Society of Chemistry journal article supplement (doi:10.1039/c2sm26562a), 2012-01-01
Supplement: c2sm26562a.pdf [file c2sm26562a.pdf]

## Stimuli-Responsive Cylindrical Nanopore Structures Obtained by the Layer-by-Layer Deposition within AAO Templates

Younghyun Cho<sup>a</sup>, Jaehoon Lim<sup>a</sup>, and Kookheon Char<sup>\*a</sup>

### Electronic Supplementary Information

#### Figures

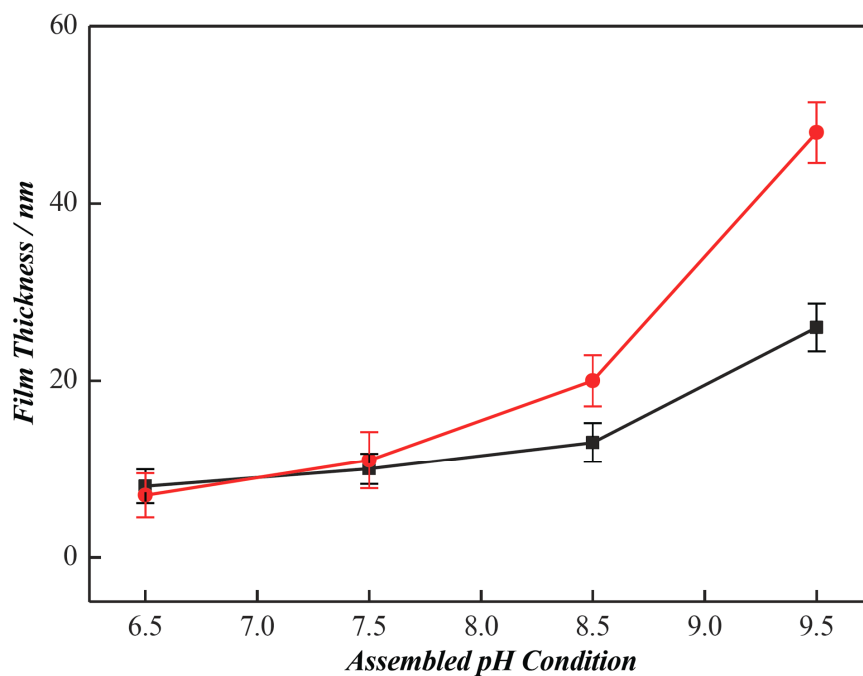

**Fig. S1** Changes in film thickness of (PAH/PSS)<sub>5</sub> multilayers assembled at different pH with 5 mM of CaCl<sub>2</sub> on flat substrates before (black squares) and after (red circles) the post-treatment at pH 2.

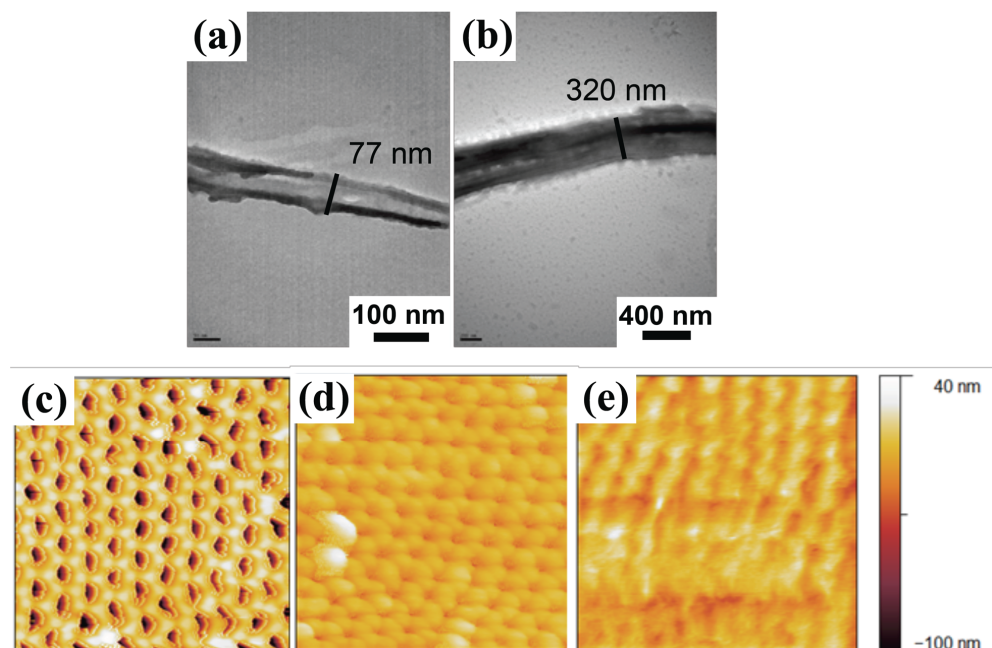

**Fig. S2** TEM images of  $(\text{PAH/PSS})_6$  multilayer structures obtained by selective removal of AAO templates post-treated at a) pH 7 and b) pH 2. AFM images of c) pristine AAO templates, d) AAO templates containing  $(\text{PAH/PSS})_6$  multilayers, and e) AAO templates containing  $(\text{PAH/PSS})_6$  multilayers post-treated at pH 2.

|      | QDs – NH <sub>3</sub> <sup>+</sup> | QDs – SO <sub>3</sub> <sup>-</sup> |
|------|------------------------------------|------------------------------------|
| pH 7 | + 1.2 mV                           | - 39.0 mV                          |
| pH 2 | + 23.8 mV                          | - 17.8 mV                          |

**Fig. S3** Zeta-Potentials of QDs with different terminating groups at different pH conditions.

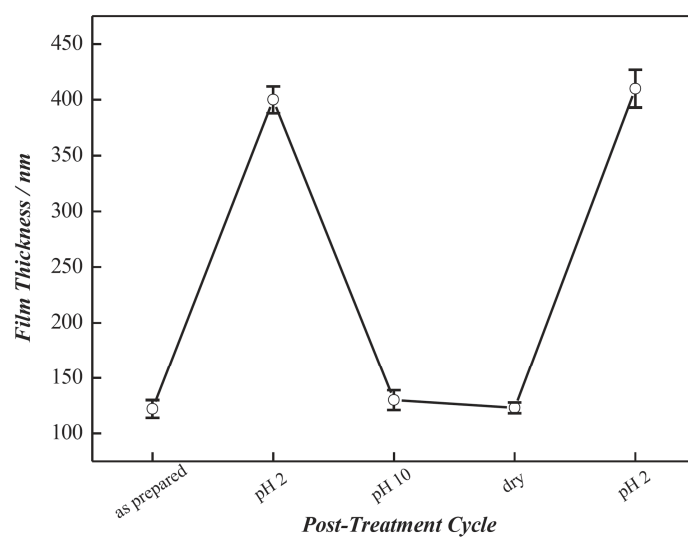

**Fig. S4** Changes in film thickness of (PAH/PSS)<sub>15</sub> multilayers assembled at pH 9.5 with 5 mM of CaCl<sub>2</sub> on a flat substrate as a function of different pH treatment.
